# Supplementary material for: Objective Assessment of Adherence and Inhaler Technique among Asthma and COPD Patients in London: A Study in Community Pharmacies Using an Electronic Monitoring Device
Source: MDPI journal article supplement (doi:10.3390/pharmacy11030094), 2023-06-04
Supplement: s1 [file s1]

## Supplementary file 1: Patient satisfaction questionnaire

Code:

### Patient feedback questionnaire:

Dear participant,

Thank you very much for participating in our study, we would like to get your feedback about your experience in the study. Please note that responses will be kept strictly confidential, and will not be shared even with your healthcare team.

#### **Section 1:**

Could you please tell me about your experience with using INCA™ technology regarding the following:

1- The use of the adapted inhaler (the inhaler with the INCA™ device)

|           |      |                               |           |                |
|-----------|------|-------------------------------|-----------|----------------|
| Very easy | Easy | Neither easy<br>nor difficult | Difficult | Very difficult |
| 1         | 2    | 3                             | 4         | 5              |

2- The handling of the adapted inhaler (the inhaler with the INCA™ device)

|                    |            |           |            |                    |
|--------------------|------------|-----------|------------|--------------------|
| Very<br>manageable | Manageable | Undecided | cumbersome | Very<br>cumbersome |
| 1                  | 2          | 3         | 4          | 5                  |

#### **Section 2:**

Please rate the ease of the following:

3- The **information** provided by the pharmacist about **my inhaler use**

|           |      |                               |           |                |
|-----------|------|-------------------------------|-----------|----------------|
| Very easy | Easy | Neither easy<br>nor difficult | Difficult | Very difficult |
| 1         | 2    | 3                             | 4         | 5              |

4- The **feedback** discussed with the pharmacist about **my inhaler use**

|           |      |                               |           |                |
|-----------|------|-------------------------------|-----------|----------------|
| Very easy | Easy | Neither easy<br>nor difficult | Difficult | Very difficult |
| 1         | 2    | 3                             | 4         | 5              |

5- The **consultation style** of the pharmacist

|           |      |                               |           |                |
|-----------|------|-------------------------------|-----------|----------------|
| Very easy | Easy | Neither easy<br>nor difficult | Difficult | Very difficult |
| 1         | 2    | 3                             | 4         | 5              |

6- The **language** used by the pharmacist during the discussion/consultation

|           |      |                               |           |                |
|-----------|------|-------------------------------|-----------|----------------|
| Very easy | Easy | Neither easy<br>nor difficult | Difficult | Very difficult |
| 1         | 2    | 3                             | 4         | 5              |

### **Section 3:**

Please rate the usefulness of the following:

7- The **information** provided by the pharmacist about **my inhaler use** was useful

|                   |       |                               |          |                      |
|-------------------|-------|-------------------------------|----------|----------------------|
| Strongly<br>agree | Agree | Neither agree<br>nor disagree | Disagree | Strongly<br>disagree |
| 1                 | 2     | 3                             | 4        | 5                    |

8- The **feedback** discussed with the pharmacist about **my inhaler use** was useful

|                   |       |                               |          |                      |
|-------------------|-------|-------------------------------|----------|----------------------|
| Strongly<br>agree | Agree | Neither agree<br>nor disagree | Disagree | Strongly<br>disagree |
| 1                 | 2     | 3                             | 4        | 5                    |

#### **Section 4:**

Please rate your satisfaction with the following:

9- Time spent with the pharmacist during the discussion

| Very satisfied | Satisfied | Neither satisfied nor dissatisfied | Dissatisfied | Very dissatisfied |
|----------------|-----------|------------------------------------|--------------|-------------------|
| 1              | 2         | 3                                  | 4            | 5                 |

10- Information provided during the consultation

| Very satisfied | Satisfied | Neither satisfied nor dissatisfied | Dissatisfied | Very dissatisfied |
|----------------|-----------|------------------------------------|--------------|-------------------|
| 1              | 2         | 3                                  | 4            | 5                 |

11- Feedback provided during the consultation

| Very satisfied | Satisfied | Neither satisfied nor dissatisfied | Dissatisfied | Very dissatisfied |
|----------------|-----------|------------------------------------|--------------|-------------------|
| 1              | 2         | 3                                  | 4            | 5                 |

12- Overall satisfaction with the discussion received by the pharmacist

| Very satisfied | Satisfied | Neither satisfied nor dissatisfied | Dissatisfied | Very dissatisfied |
|----------------|-----------|------------------------------------|--------------|-------------------|
| 1              | 2         | 3                                  | 4            | 5                 |

13- Please provide any further comments you want to share with us

---

---

---

---

Thank you for taking time to complete this questionnaire.
